# Supplementary material for: A Mitochondrial Superoxide Signal Triggers Increased Longevity in Caenorhabditis elegans
Source: PLoS Biol. 2010 Dec 7;8(12):e1000556. doi: 10.1371/journal.pbio.1000556 (PMC2998438; doi:10.1371/journal.pbio.1000556)
Supplement: Figure S1 — Selection of isolated mitochondria and ROS-sensitive dye analysis. Mitochondria were prepared as described in Materials and Methods. (A) A FACSCalibur flow cytometry cell sorter from Becton Dickinson equipped with a 488 nm Argon laser and a 635 nm red diode laser was used. Data from the experiments were analyzed using the CellQuest software (Becton Dickinson). To exclude debris, samples were gated based on light-scattering properties in the SSC (side scatter) and FSC (forward scatter) modes, and 20,000 events per sample within the region (gate) delimitated by a square in (A) were collected, using the “low” setting for sample flow rate. 99% of the particles in that region successfully stained with the mitochondria-specific dye Mitotracker Green. (B) Isolated mitochondria were incubated with analysis buffer containing substrate (see Materials and Methods) and MitoSox (1 µM) at room temperature for 1 h and then sorted and the fluorescence of mitochondria in the gate measured. The purple area represents un-stained control. Paraquat (red line) was able to increase ROS generation over the untreated control (green line), while NAC (blue line) decreased the superoxide signal. Note that the x-axis shows a log scale. (C) Isolated mitochondria (see A) from wild-type worms were stained with both H2DCF-DA (the signal plotted on FL1-H; 530±15 nm channel) and Mitotracker Red (the signal plotted on FL3-H; ≥670 nm channel). When particles were stained by both dyes (upper-right region), the signals were strongly correlated. Furthermore, 89.6%±2.4% (n = 4) of the particles stained by H2DCF-DA were also stained by Mitotracker Red. (0.11 MB PDF) [file pbio.1000556.s001.pdf]

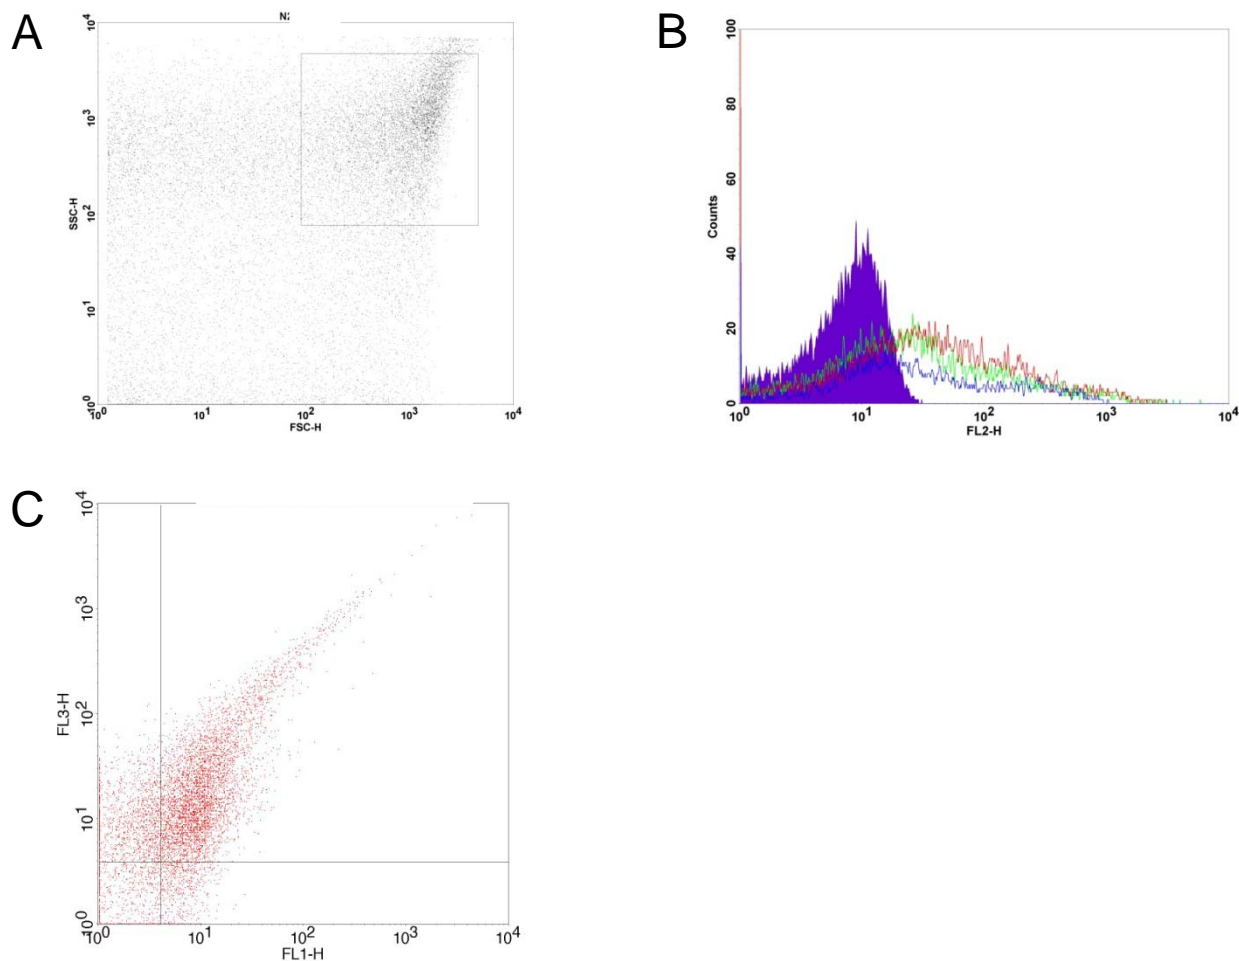

Selection of isolated mitochondria and ROS-sensitive dye analysis. Mitochondria were prepared as described in Material and Methods. A: A FACSCalibur flow cytometry cell sorter from Becton Dickinson equipped with a 488-nm Argon laser and a 635-nm red diode laser was used. Data from the experiments were analyzed using the CellQuest software (Becton Dickinson). To exclude debris, samples were gated based on light-scattering properties in the SSC (side scatter) and FSC (forward scatter) modes, and 20,000 events per sample within the region (gate) delimited by a square in A. were collected, using the "low" setting for sample flow rate. 99% of the particles in that region successfully stained with the mitochondria-specific dye Mitotracker Green. B. Isolated mitochondria were incubated with analysis buffer contain substrate (see Materials and Methods) and MitoSox (1 $\mu$ M) at room temperature for 1 hour and then sorted and the fluorescence of mitochondria in the gate measured. The purple area represents unstained control. Paraquat (red line) was able to increase ROS generation over the untreated control (green line), while NAC (blue line) decreased the superoxide signal. Note that the X-axis shows a log scale. C. Isolated mitochondria (see A.) from wild-type worms were stained with both H<sub>2</sub>DCF-DA (the signal plotted on FL1-H; 530  $\pm$  15 nm channel) and Mitotracker Red (the signal plotted on FL3-H;  $\geq$ 670nm channel). When particles were stained by both dyes (upper-right region), the signals were strongly correlated. Furthermore, 89.6  $\pm$  2.4% (n=4) of the particles stained by H<sub>2</sub>DCF-DA were also stained by Mitotracker Red.
