# Supplementary material for: A Mitochondrial Superoxide Signal Triggers Increased Longevity in Caenorhabditis elegans
Source: PubMed Central journal article supplement (PMC2998438; doi:10.1371/journal.pbio.1000556), 2010-12-07
Supplement: pbio.1000556.s005.pdf [file pbio.1000556.s005.pdf]

*nuo-6(qm200)*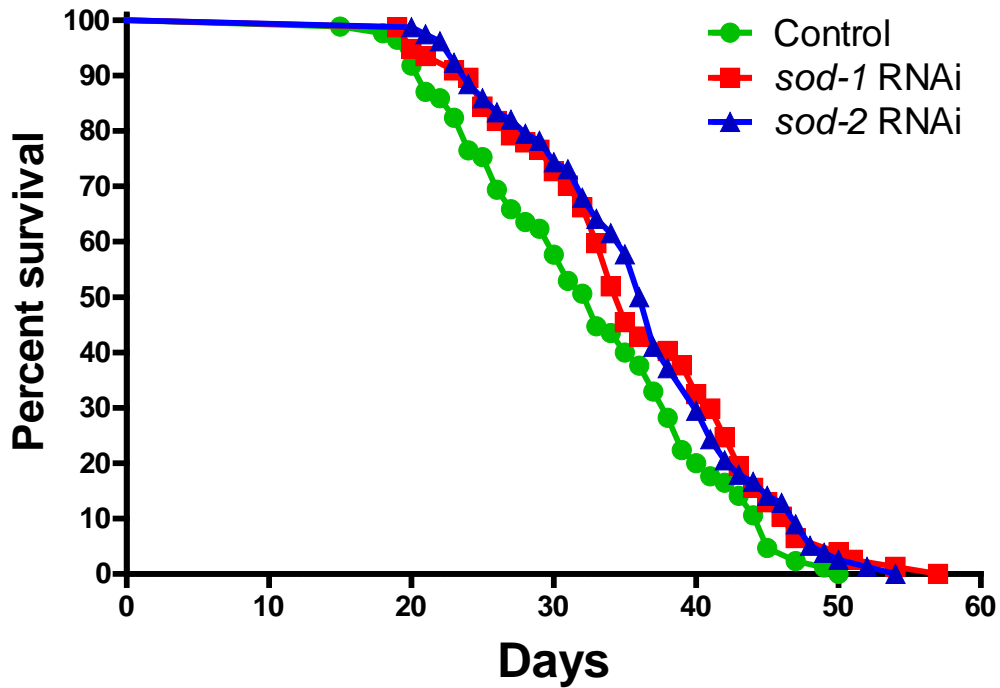

Knocking down *sod-1* (red) or *sod-2* (blue) does not shorten the long lifespan of *nuo-6(qm200)* mutant. In fact silencing these two genes slightly increases the lifespan of *nuo-6* mutants. Mean lifespan of control (empty vector) is 33 days (green), mean lifespan after *sod-1* RNAi treatment is 35 days and mean lifespan after *sod-2* RNAi treatment is 36.5 days,  $p < 0.05$  for both RNAi experiments compare to control, analyzed by curve comparison using the log-rank test.
