# Supplementary material for: A Mitochondrial Superoxide Signal Triggers Increased Longevity in Caenorhabditis elegans
Source: PubMed Central journal article supplement (PMC2998438; doi:10.1371/journal.pbio.1000556), 2010-12-07
Supplement: pbio.1000556.s006.pdf [file pbio.1000556.s006.pdf]

Supporting Table S1: Individual aging experiments and statistics

| Genotype              | Treatment                                  | Mean lifespan (days) | Maximum lifespan (days) | p-values vs. control* | Mean lifespan change (days) |
|-----------------------|--------------------------------------------|----------------------|-------------------------|-----------------------|-----------------------------|
| <b>Wild type (N2)</b> | Control <sup>#</sup>                       | 19.1 ± 3.4 (n =50)   | 28                      |                       |                             |
|                       | 0.1 mM paraquat (PQ)                       | 31.0 ± 4.7 (n =50)   | 40                      | P<0.0001              | +10.9                       |
| <b>Wild type (N2)</b> | Control                                    | 15.0 ± 3.1 (n =50)   | 22                      |                       |                             |
|                       | 0.05 mM PQ                                 | 22.0 ± 2.7 (n =46)   | 30                      | P<0.0001              | +7.0                        |
|                       | 0.1 mM PQ                                  | 28.9 ± 6.8 (n =50)   | 40                      | P<0.0001              | +13.9                       |
|                       | 0.2 mM PQ                                  | 21.1 ± 4.7 (n =45)   | 27                      | P<0.0001              | +6.1                        |
| <b>Wild type (N2)</b> | Control                                    | 17.8 ± 3.4 (n =50)   | 25                      |                       |                             |
|                       | 0.1 mM PQ entire life                      | 28.7 ± 6.5 (n =50)   | 43                      | P<0.0001              | +10.9                       |
|                       | 0.1 mM PQ larval dev.                      | 22.9 ± 5.2 (n =50)   | 32                      | P<0.0001              | +5.1                        |
|                       | 0.1 mM PQ adulthood                        | 27.1 ± 6.9 (n =50)   | 40                      | P<0.0001              | +9.3                        |
| <b>Wild type (N2)</b> | Empty vector (HT115) to OP50**             | 20.9 ± 3.8 (n =50)   | 27                      |                       |                             |
|                       | Empty vector (HT115) to 0.1 mM PQ (OP50)** | 23.5 ± 4.8 (n =50)   | 30                      |                       | +3.4                        |
|                       |                                            | 22.7 ± 4.2 (n =50)   | 31                      | P<0.0001              | +2.6                        |
| <b>Wild type (N2)</b> | <i>nuo-6</i> RNAi to OP50**                | 24.4 ± 4.4 (n =50)   | 32                      |                       |                             |
|                       |                                            | 22.2 ± 4.6 (n =50)   | 28                      |                       |                             |
|                       | <i>nuo-6</i> RNAi to 0.1 mM PQ (OP50)**    | 31.7 ± 3.5 (n =50)   | 41                      |                       | +8.1                        |
|                       |                                            | 28.6 ± 3.3 (n =50)   | 33                      | P<0.0001              | +6.3                        |
| <b>Wild type (N2)</b> | <i>isp-1</i> RNAi to OP50**                | 22.4 ± 5.4 (n =50)   | 34                      |                       |                             |
|                       |                                            | 23.5 ± 6.2 (n =50)   | 32                      |                       |                             |
|                       | <i>isp-1</i> RNAi to 0.1 mM PQ (OP50)**    | 25.5 ± 4.8 (n =50)   | 36                      |                       | +2.5                        |
|                       |                                            | 24.5 ± 5.1 (n =50)   | 35                      |                       | +1.5                        |
| <b>Wild type (N2)</b> | Dead bacteria                              | 23.0 ± 4.2 (n =50)   | 30                      |                       |                             |

Supporting Table S1

|                            |                        |                    |    |                                  |       |
|----------------------------|------------------------|--------------------|----|----------------------------------|-------|
|                            | Dead bact. + 0.1 mM PQ | 30.4 ± 3.2 (n =50) | 37 | P<0.0001                         | +16.6 |
| <b><i>clk-1(qm30)</i></b>  | Dead bacteria          | 25.9 ± 6.9 (n =50) | 40 |                                  |       |
|                            | Dead bact + 0.1 mM PQ  | 37.3 ± 3.4 (n =50) | 44 | P<0.0001                         | +11.4 |
| <b><i>isp-1(qm150)</i></b> | Dead bacteria          | 36.2 ± 7.1 (n =29) | 55 |                                  |       |
|                            | Dead bact. + 0.1 mM PQ | 36.8 ± 6.5 (n =30) | 49 | P=0.8489                         | +0.6  |
| <b><i>nuo-6(qm200)</i></b> | Dead bacteria          | 38.5 ± 5.8 (n =30) | 49 |                                  |       |
|                            | Dead bact. + 0.1 mM PQ | 38.0 ± 5.7 (n =27) | 49 | P=0.9777                         | -0.5  |
| <b><i>daf-2(e1370)</i></b> | Dead bacteria          | 41.7 ± 9.4 (n =50) | 59 |                                  |       |
|                            | Dead bact.+ 0.1 mM PQ  | 60.9 ± 9.2 (n =20) | 83 | P<0.0001                         | +19.2 |
| <b><i>daf-16(m26)</i></b>  | Dead bacteria          | 23.1 ± 2.9 (n =50) | 27 |                                  |       |
|                            | Dead bact. + 0.1 mM PQ | 26.0 ± 2.8 (n =50) | 31 | P<0.0001                         | +2.9  |
| <b>Wild type (N2)</b>      | Control                | 19.3 ± 3.4 (n =50) | 24 |                                  |       |
|                            | Benzyl viologen        | 26.9 ± 3.4 (n =50) | 29 | P<0.0001                         | +7.6  |
|                            | Benzyl viologen        | 26.4 ± 3.8 (n =50) | 30 |                                  | +7.1  |
| <b>Wild type (N2)</b>      | Control                | 22.0 ± 3.1 (n =50) | 28 |                                  |       |
|                            | Control                | 18.7 ± 4.0 (n =50) | 27 |                                  |       |
|                            | Control                | 21.0 ± 4.4 (n =50) | 29 |                                  |       |
|                            | 0.1 mM PQ              | 27.8 ± 3.4 (n =50) | 35 | P<0.0001                         | +7.2  |
|                            | 0.1 mM PQ              | 29.4 ± 5.7 (n =50) | 30 |                                  | +8.8  |
|                            | 0.1 mM PQ              | 28.6 ± 5.0 (n =50) | 39 |                                  | +8.0  |
| <b>Wild type (N2)</b>      | Control                | 18.5 ± 3.0 (n =50) | 24 | P=0.0127 (P=0.0010) <sup>+</sup> |       |
| <b><i>clk-1(qm30)</i></b>  | Control                | 20.9 ± 4.1 (n =50) | 30 |                                  |       |
|                            | Control                | 20.3 ± 3.1 (n =50) | 29 |                                  |       |
|                            | Control                | 21.1 ± 4.4 (n =50) | 33 |                                  |       |
|                            | 0.1 mM PQ              | 34.3 ± 5.2 (n =50) | 43 | P<0.0001                         | +13.5 |
|                            | 0.1 mM PQ              | 34.7 ± 5.6 (n =50) | 45 |                                  | +13.9 |
|                            | 0.1 mM PQ              | 40.4 ± 7.7 (n =50) | 58 |                                  | +19.6 |

Supporting Table S1

|                                              |           |                     |    |          |       |
|----------------------------------------------|-----------|---------------------|----|----------|-------|
|                                              | 0.1 mM PQ | 38.0 ± 9.0 (n =50)  | 53 |          | +17.2 |
| <b><i>daf-2(e1370)</i></b>                   | Control   | 45.9 ± 8.8 (n =50)  | 67 |          |       |
|                                              | Control   | 44.1 ± 6.0 (n =50)  | 55 |          |       |
|                                              | Control   | 41.4 ± 11.0 (n =50) | 65 |          |       |
|                                              | 0.1 mM PQ | 42.9 ± 11.0 (n =50) | 54 | P<0.0001 | -0.8  |
|                                              | 0.1 mM PQ | 53.7 ± 10.8 (n =50) | 76 |          | +9.9  |
|                                              | 0.1 mM PQ | 51.1 ± 8.5 (n =50)  | 70 |          | +7.3  |
| <b><i>daf-2(e1370);<br/>nuo-6(qm200)</i></b> | Control   | 47.3 ± 15.9 (n =45) | 81 |          | +5.5  |
|                                              | Control   | 48.6 ± 16.3 (n =50) | 76 | P<0.0001 | +6.8  |
| <b><i>isp-1(qm150)</i></b>                   | Control   | 33.6 ± 7.9 (n =50)  | 53 |          |       |
|                                              | Control   | 33.5 ± 7.8 (n =50)  | 50 |          |       |
|                                              | Control   | 34.3 ± 7.9 (n =50)  | 50 |          |       |
|                                              | 0.1 mM PQ | 34.2 ± 7.3 (n =50)  | 50 | P=0.0961 | +0.4  |
|                                              | 0.1 mM PQ | 33.3 ± 6.5 (n =50)  | 50 |          | -0.5  |
|                                              | 0.1 mM PQ | 37.3 ± 5.0 (n =50)  | 47 |          | +3.5  |
|                                              | 0.1 mM PQ | 30.6 ± 8.3 (n =50)  | 51 |          | -3.2  |
| <b><i>nuo-6(qm200)</i></b>                   | Control   | 35.9 ± 8.2 (n =50)  | 49 |          |       |
|                                              | Control   | 30.7 ± 7.6 (n =50)  | 50 |          |       |
|                                              | Control   | 32.4 ± 7.2 (n =50)  | 46 |          |       |
|                                              | Control   | 33.5 ± 7.5 (n =50)  | 48 |          |       |
|                                              | Control   | 34.2 ± 7.1 (n =50)  | 47 |          | +1.1  |
|                                              | 0.1 mM PQ | 38.4 ± 6.4 (n =50)  | 52 | P=0.0125 | +5.3  |
|                                              | 0.1 mM PQ | 34.6 ± 9.9 (n =50)  | 54 |          | +1.5  |
|                                              | 0.1 mM PQ | 34.5 ± 7.2 (n =50)  | 46 |          | +1.4  |
|                                              | 0.1 mM PQ | 35.3 ± 8.5 (n =50)  | 53 |          | +2.2  |
|                                              | 0.1 mM PQ | 34.6 ± 9.9 (n =50)  | 54 |          | +1.5  |
| <b><i>sod-2(ok1030)</i></b>                  | Control   | 23.1 ± 4.6 (n =50)  | 38 |          |       |

## Supporting Table S1

|                             |                    |                    |    |          |       |
|-----------------------------|--------------------|--------------------|----|----------|-------|
|                             | Control            | 21.3 ± 4.6 (n =50) | 33 |          |       |
|                             | 0.1 mM PQ          | 26.2 ± 4.0 (n =50) | 36 | P<0.0001 | +4.0  |
|                             | 0.1 mM PQ          | 31.4 ± 4.1 (n =50) | 39 |          | +9.2  |
| <b><i>daf-16(m26)</i></b>   | Control            | 19.1 ± 2.9 (n =50) | 23 |          |       |
|                             | Control            | 16.9 ± 2.1 (n =50) | 21 |          |       |
|                             | Control            | 16.5 ± 8.5 (n =50) | 20 |          |       |
|                             | Control            | 23.1 ± 2.9 (n =50) | 27 |          |       |
|                             | 0.1 mM PQ          | 22.0 ± 2.8 (n =50) | 27 | P<0.0001 | +3.1  |
|                             | 0.1 mM PQ          | 22.5 ± 3.9 (n =50) | 28 |          | +3.6  |
|                             | 0.1 mM PQ          | 22.1 ± 8.5 (n =50) | 28 |          | +3.2  |
|                             | 0.1 mM PQ          | 26.0 ± 2.8 (n =50) | 31 |          | +7.1  |
| <b><i>aak-2(ok524)</i></b>  | Control            | 17.6 ± 2.5 (n =50) | 22 |          |       |
|                             | Control            | 17.0 ± 2.4 (n =50) | 22 |          |       |
|                             | 0.1 mM PQ          | 21.1 ± 3.3 (n =50) | 29 | P<0.0001 | +3.8  |
|                             | 0.1 mM PQ          | 22.8 ± 5.2 (n =50) | 30 |          | +5.5  |
| <b><i>hsf-1(y441)</i></b>   | Control            | 15.9 ± 3.1 (n =50) | 22 |          |       |
|                             | Control            | 13.9 ± 2.7 (n =50) | 20 |          |       |
|                             | 0.1 mM PQ          | 25.6 ± 6.1 (n =50) | 37 | P<0.0001 | +10.7 |
|                             | 0.1 mM PQ          | 21.3 ± 4.2 (n =50) | 32 |          | +6.4  |
| <b><i>hif-1(ia4)</i></b>    | Control            | 23.4 ± 4.1 (n =50) | 30 |          |       |
|                             | 0.1 mM PQ          | 28.7 ± 6.8 (n =50) | 41 | P<0.0001 | +5.3  |
| <b>Wild type (N2)</b>       | Control            | 19.2 ± 2.5 (n =50) | 24 |          |       |
|                             | Control            | 18.5 ± 2.8 (n =50) | 24 |          |       |
|                             | 0.1 mM PQ on adult | 25.2 ± 3.1 (n =50) | 29 | P<0.0001 | +6.3  |
|                             | 0.1 mM PQ on adult | 25.3 ± 3.7 (n =50) | 30 |          | +6.4  |
| <b><i>wwp-1(ok1102)</i></b> | Control            | 22.3 ± 3.0 (n =50) | 28 |          |       |
|                             | Control            | 21.5 ± 2.9 (n =50) | 28 |          |       |

## Supporting Table S1

|                            |                      |                    |    |          |       |
|----------------------------|----------------------|--------------------|----|----------|-------|
|                            | 0.1 mM PQ on adult   | 30.0 ± 5.6 (n =50) | 37 | P<0.0001 | +8.1  |
|                            | 0.1 mM PQ on adult   | 28.1 ± 4.6 (n =50) | 34 |          | +6.2  |
| <b><i>skn-1(zn67)</i></b>  | Control              | 17.6 ± 2.3 (n =50) | 22 |          |       |
|                            | 0.1 mM PQ on adult   | 22.8 ± 2.8 (n =50) | 25 | P<0.0001 | +5.2  |
| <b><i>nuo-6(qm200)</i></b> | Empty vector (HT115) | 32.0 ± 9.0 (n =40) | 49 |          |       |
|                            | Empty vector (HT115) | 32.4 ± 8.6 (n =40) | 48 |          |       |
|                            | <i>sod-1</i> RNAi    | 34.4 ± 7.0 (n =40) | 44 | P<0.0001 | +2.2  |
|                            | <i>sod-1</i> RNAi    | 37.3 ± 9.8 (n =40) | 56 |          | +5.1  |
|                            | <i>sod-2</i> RNAi    | 36.0 ± 8.3 (n =40) | 51 | P<0.0001 | +3.6  |
|                            | <i>sod-2</i> RNAi    | 36.4 ± 7.8 (n =40) | 53 |          | +4.2  |
| <b>Wild type (N2)</b>      | Control              | 22.1 ± 3.7 (n =50) | 28 |          |       |
|                            | Control              | 19.4 ± 3.4 (n =50) | 27 |          |       |
|                            | 1 mM NAC             | 20.2 ± 3.4 (n =50) | 27 |          | -0.6  |
|                            | 10 mM NAC            | 19.6 ± 2.6 (n =50) | 26 | P=0.1655 | -1.2  |
|                            | 10 mM NAC            | 20.8 ± 3.6 (n =50) | 30 |          | -0.0  |
| <b>Wild type (N2)</b>      | Control              | 20.3 ± 3.0 (n =50) | 27 |          |       |
|                            | 15 mM NAC            | 21.6 ± 4.2 (n =50) | 31 |          | +1.3  |
|                            | 1 mM Vit C           | 21.0 ± 3.0 (n =50) | 28 |          | +0.7  |
| <b>Wild type (N2)</b>      | Control              | 17.6 ± 2.5 (n =50) | 22 |          |       |
|                            | 8 mM NAC             | 16.6 ± 3.2 (n =37) | 21 |          | -1.0  |
|                            | 10 mM NAC            | 16.5 ± 2.5 (n =42) | 20 |          | -1.1  |
| <b><i>nuo-6(qm200)</i></b> | Control              | 33.4 ± 7.6 (n =50) | 50 |          |       |
|                            | Control              | 33.4 ± 9.8 (n =50) | 54 |          |       |
|                            | 1 mM NAC             | 31.2 ± 9.0 (n =50) | 45 |          | -2.2  |
|                            | 10 mM NAC            | 21.1 ± 2.2 (n =38) | 25 | P<0.0001 | -12.3 |
|                            | 10 mM NAC            | 20.1 ± 3.6 (n =35) | 28 |          | -13.3 |
| <b><i>nuo-6(qm200)</i></b> | Control              | 32.8 ± 6.9 (n =50) | 47 |          |       |

Supporting Table S1

|                             |            |                    |                 |          |       |
|-----------------------------|------------|--------------------|-----------------|----------|-------|
|                             | 0.2 mM PQ  | 27.8 ± 7.2 (n =27) | 39              |          | -4.0  |
|                             | 1 mM Vit C | 25.8 ± 6.2 (n =50) | 37              | P<0.001  | -6.0  |
|                             | 1 mM Vit C | 27.0 ± 7.5 (n =50) | 41              | P<0.001  | -5.2  |
| <b><i>clk-1(qm30)</i></b>   | Control    | 22.1 ± 3.0 (n =46) | 33              |          |       |
|                             | Control    | 22.8 ± 4.3 (n =46) | 33              |          |       |
|                             | 10 mM NAC  | 22.2 ± 3.3 (n =50) | 30              | P=0.4247 | -0.3  |
|                             | 10 mM NAC  | 23.7 ± 4.4 (n =50) | 30              |          | +1.2  |
| <b><i>clk-1(qm30)</i></b>   | Control    | 22.4 ± 4.4 (n =50) | 34              |          |       |
|                             | Control    | 22.3 ± 5.2 (n =50) | 37              |          |       |
|                             | 15 mM NAC. | 22.2 ± 2.0 (n =50) | 27 <sup>s</sup> |          | -0.1  |
|                             | 15 mM NAC  | 22.2 ± 2.0 (n =50) | 27              |          | -0.1  |
| <b><i>isp-1(qm150)</i></b>  | Control    | 34.1 ± 8.2 (n =50) | 47              |          |       |
|                             | Control    | 33.9 ± 7.9 (n =50) | 53              |          |       |
|                             | 10 mM NAC  | 21.6 ± 2.9 (n =50) | 28              | P<0.0001 | -11.9 |
|                             | 10 mM NAC  | 28.5 ± 5.6 (n =50) | 38              |          | -5.0  |
|                             | 10 mM NAC  | 25.8 ± 4.6 (n=50)  | 35              |          | -7.7  |
|                             | 10 mM NAC  | 26.6 ± 6.2 (n =50) | 37              |          | -6.9  |
| <b><i>isp-1(qm150)</i></b>  | Control    | 32.2 ± 8.2 (n =50) | 48              |          |       |
|                             | 1 mM NAC   | 30.7 ± 9.0 (n =50) | 48              |          |       |
|                             | 1 mM NAC.  | 32.0 ± 9.6 (n =50) | 47              |          |       |
|                             | 8 mM NAC   | 27.1 ± 4.3 (n =50) | 33              |          | -5.1  |
|                             | 10 mM NAC  | 21.0 ± 2.6 (n =50) | 27              | P<0.001  | -9.5  |
|                             | 0.2 mM PQ  | 27.8 ± 7.5 (n =50) | 43              | P<0.001  | -2.7  |
|                             | 1 mM Vit C | 25.1 ± 4.8 (n =50) | 34              | P<0.001  | -5.4  |
|                             | 1 mM Vit C | 24.2 ± 5.0 (n =50) | 39              | P<0.001  | -6.3  |
| <b><i>sod-2(ok1030)</i></b> | Control    | 24.7 ± 7.7 (n =50) | 41              |          |       |

## Supporting Table S1

|                            |           |                     |    |          |      |
|----------------------------|-----------|---------------------|----|----------|------|
|                            | Control   | 23.0 ± 6.0 (n =50)  | 41 |          |      |
|                            | 10 mM NAC | 20.8 ± 3.2 (n =50)  | 29 | P<0.0001 | -3.1 |
|                            | 10 mM NAC | 19.6 ± 3.9 (n =50)  | 30 |          | -4.3 |
| <b><i>daf-2(e1370)</i></b> | Control   | 40.1 ± 11.6 (n =50) | 64 |          |      |
|                            | Control   | 43.1 ± 9.7 (n =50)  | 67 |          |      |
|                            | 10 mM NAC | 33.5 ± 9.6 (n =50)  | 54 | P<0.0001 | -8.3 |
|                            | 10 mM NAC | 39.2 ± 9.3 (n =50)  | 54 |          | -2.6 |

\*When experiments have been carried out more than once the p-values provided are for comparisons between pooled datasets for each condition.

#When the use of the RNAi strain HT115 is not specified it means that experiments were carried out with OP50.

\*\*In these experiments worms were transferred from HT115 bacteria (with empty vector or a particular clone) to OP50 at the young adult stage, at which time they are treated or not with PQ. This was because HT115 bacteria are too sensitive to PQ to remain a good food source for the worms.

†For this particular experiment, because of the relatively moderate increase in *clk-1* lifespan, we have added the lifespan of wild type controls that were carried out at the same time. In brackets we also provide the statistical significance of the difference in lifespan between the *clk-1* mutants in this experiments and the pool of the wild type from all experiments.
